# Supplementary material for: An Assessment of a New Rapid Multiplex PCR Assay for the Diagnosis of Meningoencephalitis
Source: MDPI journal article supplement (doi:10.3390/diagnostics14080802), 2024-04-11
Supplement: s1 [file s1]

## Supplementary Materials

- Detection of remnants of past VZV ME

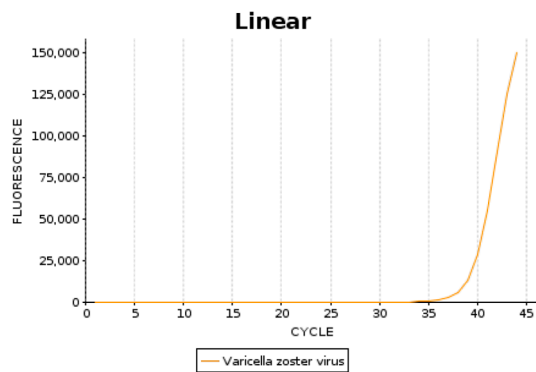

| Detected + Varicella zoster virus |               |                                       |                |
|-----------------------------------|---------------|---------------------------------------|----------------|
| User                              | administrator | Test Status                           | Completed      |
|                                   |               | Internal Controls                     | Passed         |
| RESULT DETAILS                    |               |                                       | Ct / EP        |
| Viruses                           | Not detected  | Enterovirus                           | - / -          |
|                                   | Not detected  | Herpes simplex virus 1                | - / -          |
|                                   | Not detected  | Herpes simplex virus 2                | - / -          |
|                                   | Not detected  | Human parechovirus                    | - / -          |
|                                   | Not detected  | Human herpes virus 6                  | - / -          |
|                                   | + Detected    | Varicella zoster virus                | 38.5 / 150,569 |
| Bacteria                          | Not detected  | <i>Streptococcus pneumoniae</i>       | - / -          |
|                                   | Not detected  | <i>Neisseria meningitidis</i>         | - / -          |
|                                   | Not detected  | <i>Streptococcus agalactiae</i>       | - / -          |
|                                   | Not detected  | <i>Listeria monocytogenes</i>         | - / -          |
|                                   | Not detected  | <i>Haemophilus influenzae</i>         | - / -          |
|                                   | Not detected  | <i>Escherichia coli K1</i>            | - / -          |
|                                   | Not detected  | <i>Streptococcus pyogenes</i>         | - / -          |
|                                   | Not detected  | <i>Mycoplasma pneumoniae</i>          | - / -          |
| Fungi & Yeast                     | Not detected  | <i>Cryptococcus neoformans/gattii</i> | - / -          |
| Controls                          | + Detected    | IC                                    | 33.0 / 294,354 |

- Active VZV encephalitis

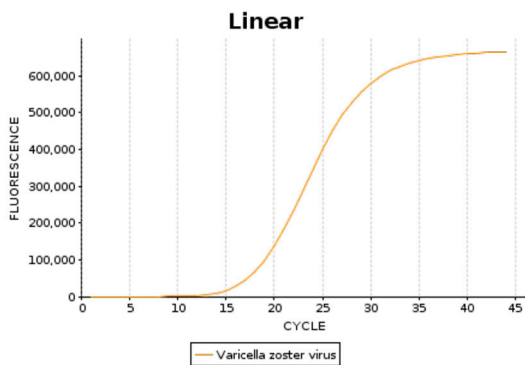

| Detected + Varicella zoster virus |               |                                       |                |
|-----------------------------------|---------------|---------------------------------------|----------------|
| User                              | administrator | Test Status                           | Completed      |
|                                   |               | Internal Controls                     | Passed         |
| RESULT DETAILS                    |               |                                       | Ct / EP        |
| Viruses                           | Not detected  | Enterovirus                           | - / -          |
|                                   | Not detected  | Herpes simplex virus 1                | - / -          |
|                                   | Not detected  | Herpes simplex virus 2                | - / -          |
|                                   | Not detected  | Human parechovirus                    | - / -          |
|                                   | Not detected  | Human herpes virus 6                  | - / -          |
|                                   | + Detected    | Varicella zoster virus                | 15.4 / 665,144 |
| Bacteria                          | Not detected  | <i>Streptococcus pneumoniae</i>       | - / -          |
|                                   | Not detected  | <i>Neisseria meningitidis</i>         | - / -          |
|                                   | Not detected  | <i>Streptococcus agalactiae</i>       | - / -          |
|                                   | Not detected  | <i>Listeria monocytogenes</i>         | - / -          |
|                                   | Not detected  | <i>Haemophilus influenzae</i>         | - / -          |
|                                   | Not detected  | <i>Escherichia coli K1</i>            | - / -          |
|                                   | Not detected  | <i>Streptococcus pyogenes</i>         | - / -          |
|                                   | Not detected  | <i>Mycoplasma pneumoniae</i>          | - / -          |
| Fungi & Yeast                     | Not detected  | <i>Cryptococcus neoformans/gattii</i> | - / -          |
| Controls                          | + Detected    | IC                                    | 33.8 / 219,794 |

**Figure S1.** Difference between the case to be interpreted as the detection of remnants of past VZV ME Ct and that of active VZV encephalitis.
